# Supplementary material for: Antimicrobial Resistance Patterns and ESBL of Uropathogens Isolated from Adult Females in Najran Region of Saudi Arabia
Source: MDPI journal article supplement (doi:10.3390/clinpract11030080), 2021-09-14
Supplement: s1 [file s1]

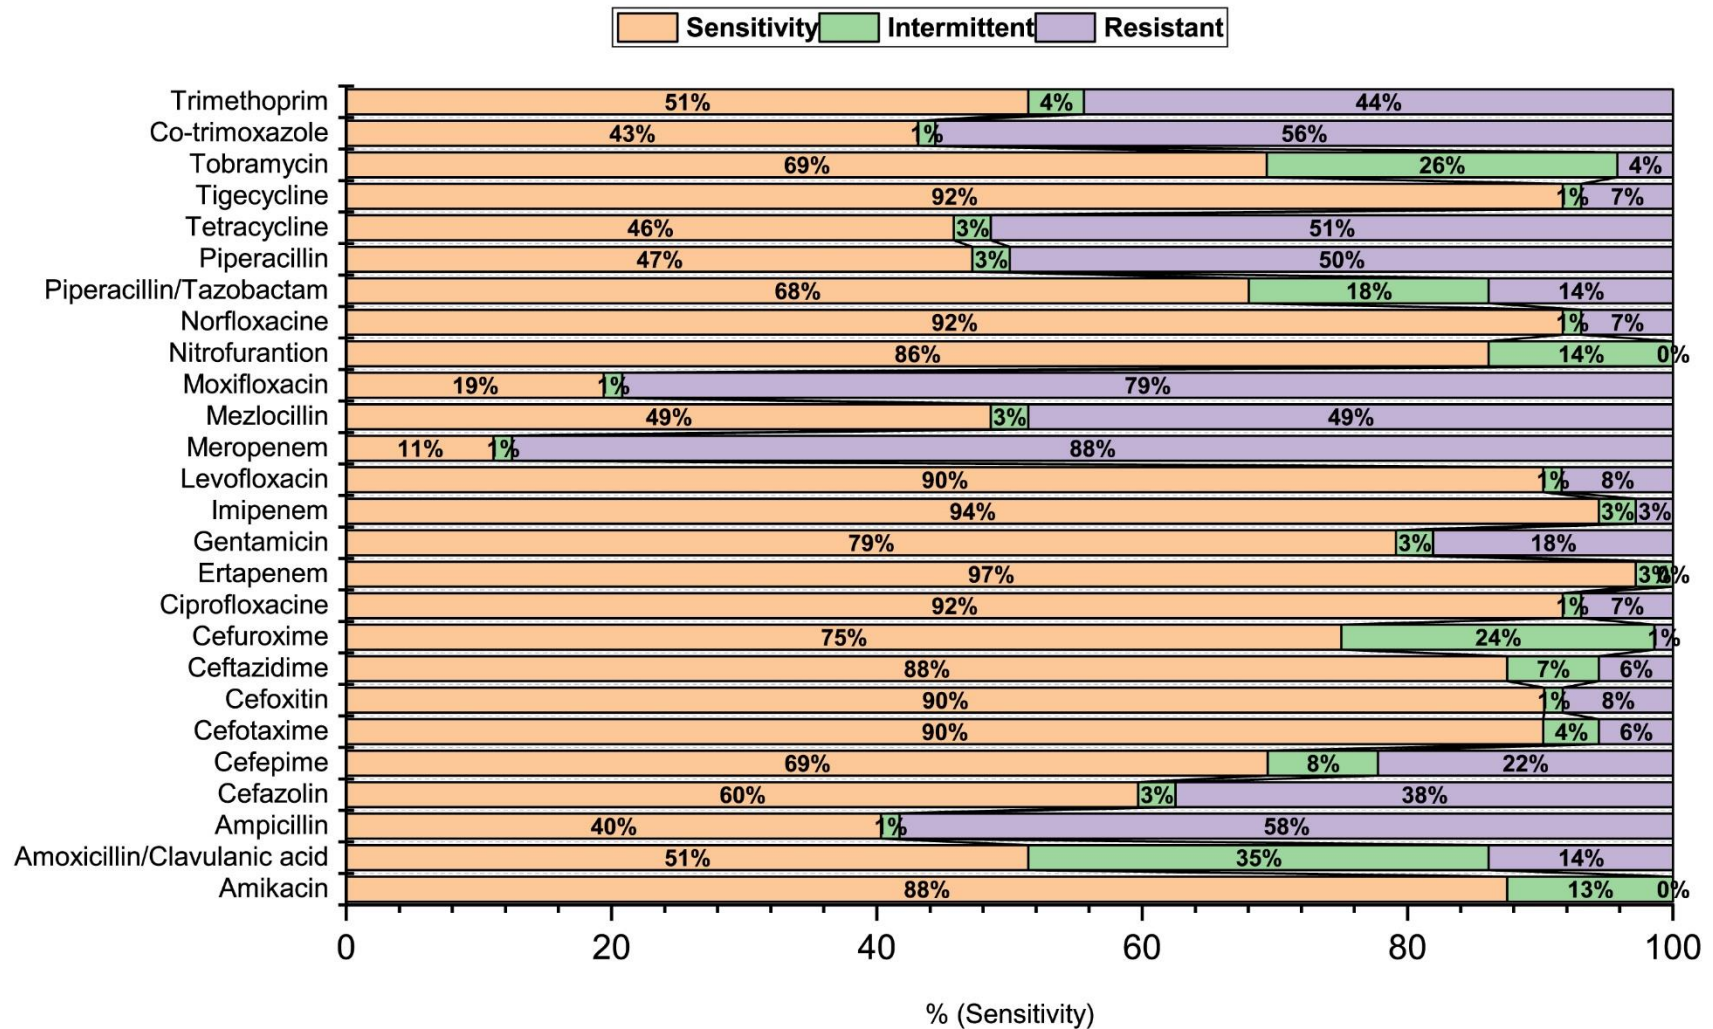

**Figure S1.** Overall sensitivity, and intermittent and resistant pattern, of isolated *E. coli* the tested antibiotics
